# Supplementary material for: Cationic N,S-chelate half-sandwich iridium complexes: synthesis, characterization, anticancer and antiplasmodial activity
Source: Royal Society of Chemistry journal article supplement (doi:10.1039/d3bm01027a), 2023-01-01
Supplement: d3bm01027a1.pdf [file d3bm01027a1.pdf]

## Supporting Information

### **Cationic *N,S*-Chelate Half-Sandwich Iridium Complexes: Synthesis, Characterization, Anticancer and Antiplasmodial Activity**

Yang Wang,<sup>a</sup> Yu-Zhou Luo,<sup>b\*</sup> Zhen-Jiang Liu,<sup>a\*</sup> Zi-Jian Yao,<sup>a\*</sup>

<sup>a</sup> School of Chemical and Environmental Engineering, Shanghai Institute of Technology, Shanghai, 201418, China.

<sup>b</sup> Scientific Research Office, Guangzhou College of Commerce, Guangzhou, 511363, China

Corresponding author: Email: [zjyao@sit.edu.cn](mailto:zjyao@sit.edu.cn); Tel: +86-21-60877227, Fax: +86-21-60873335.

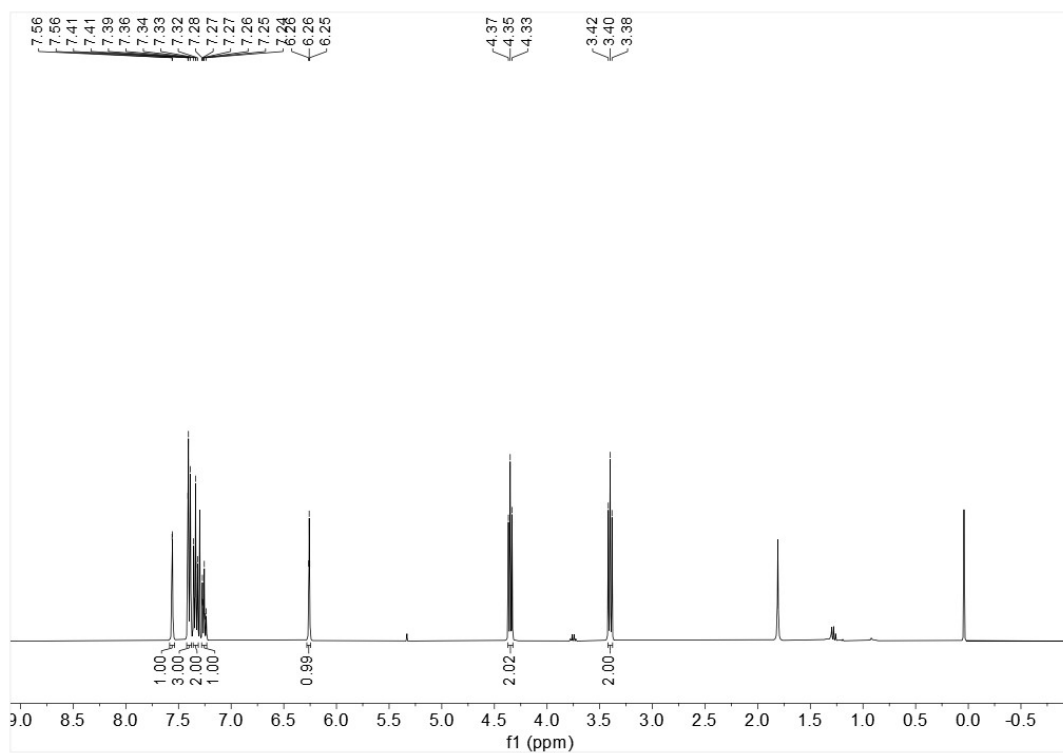

Figure S1.  $^1\text{H}$  NMR spectra of L1

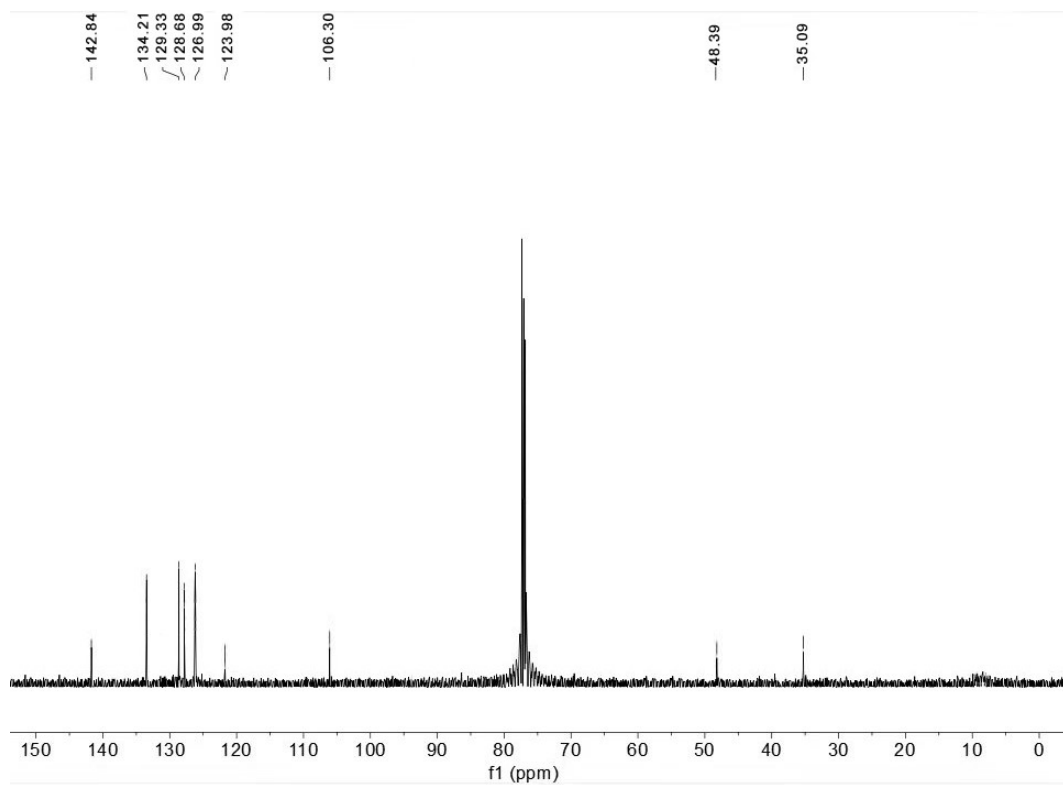

Figure S2.  $^{12}\text{C}$  NMR spectra of L1

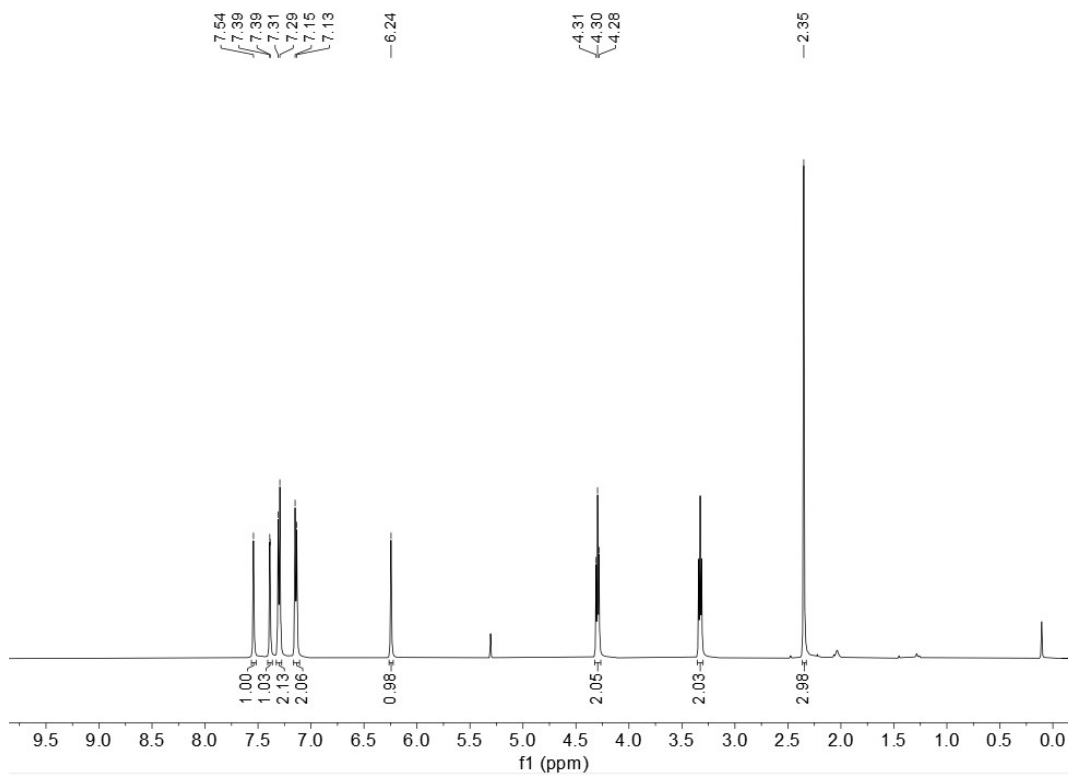

Figure S3.  $^1\text{H}$  NMR spectra of L2

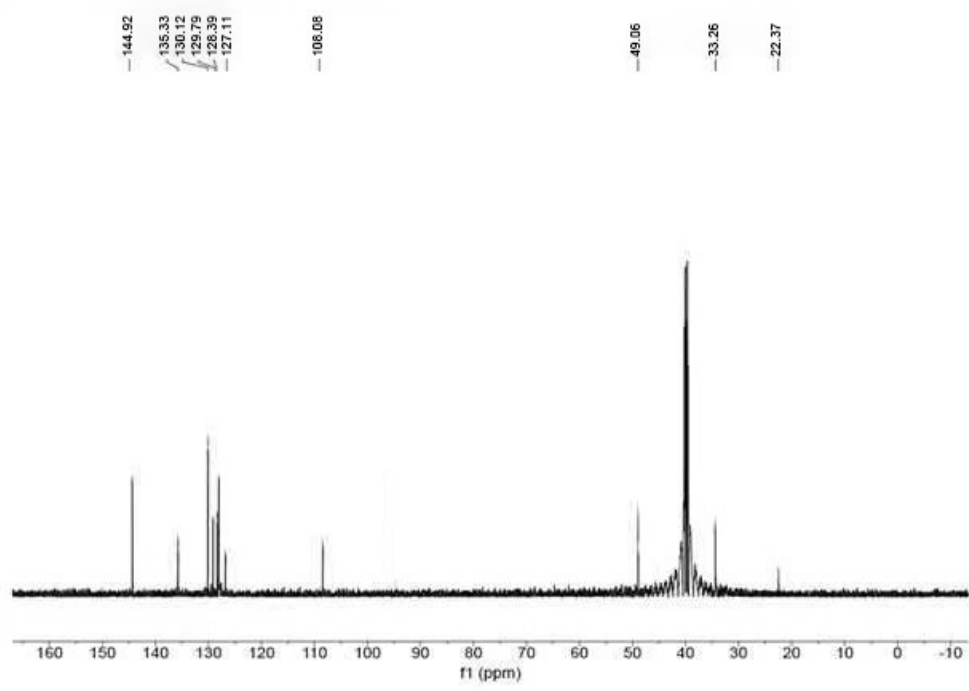

Figure S4.  $^{13}\text{C}$  NMR spectra of L2

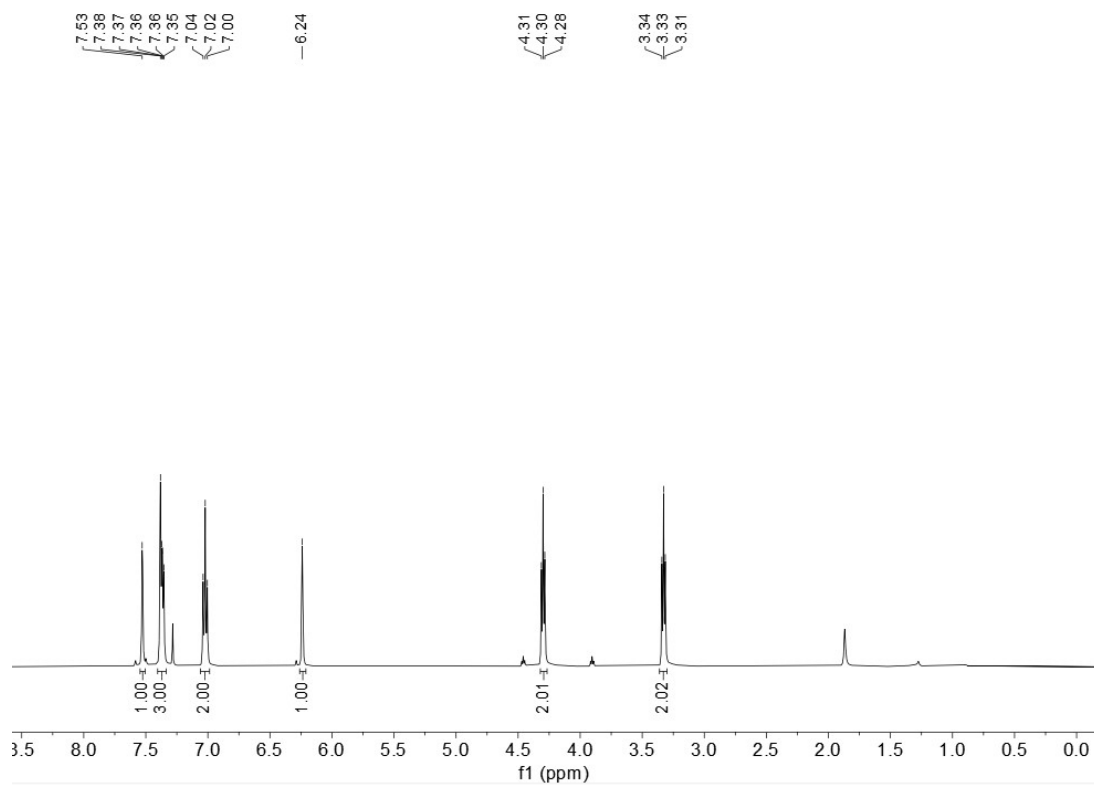

Figure S5.  $^1\text{H}$  NMR spectra of **L3**

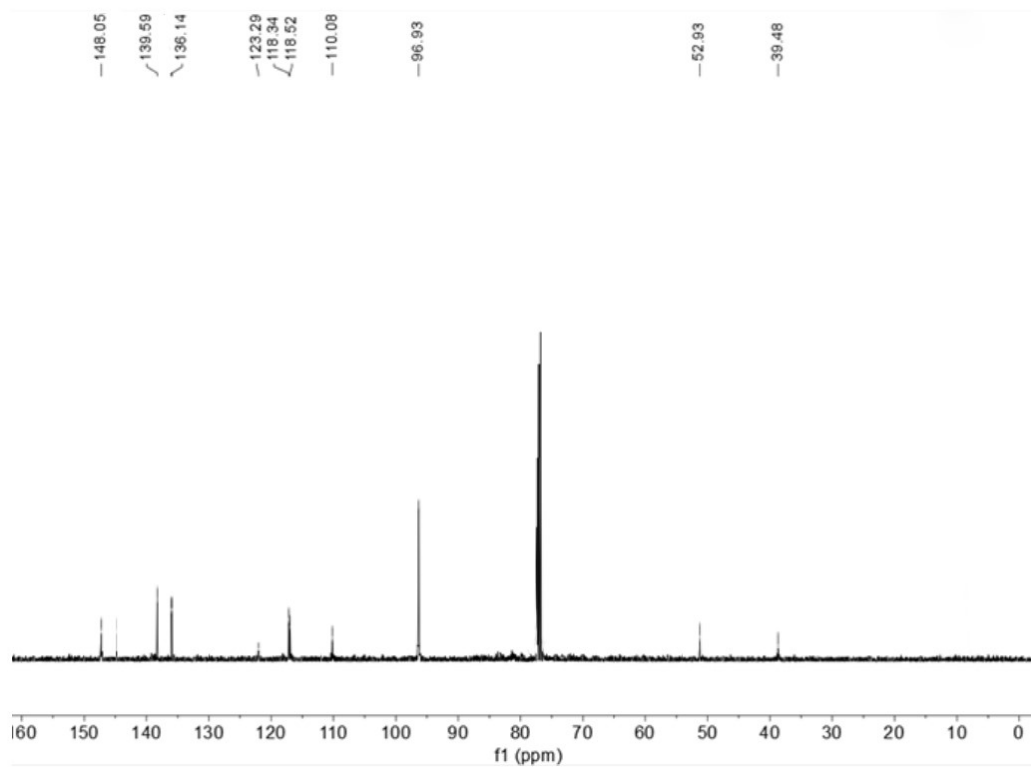

Figure S6.  $^{13}\text{C}$  NMR spectra of **L3**

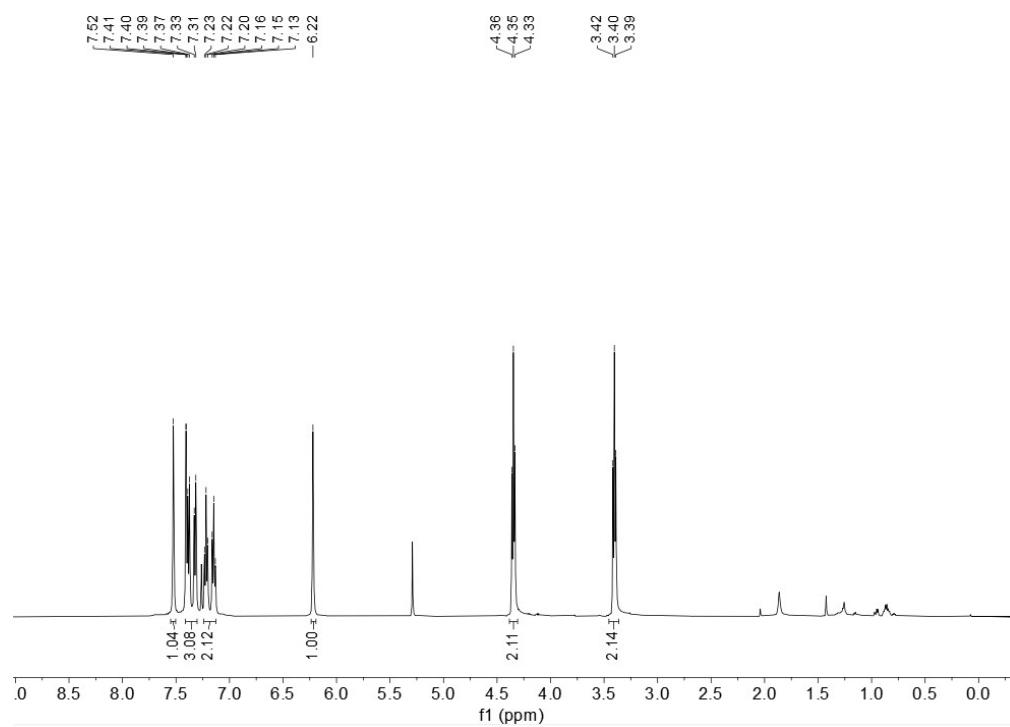

Figure S7.  $^1\text{H}$  NMR spectra of L4

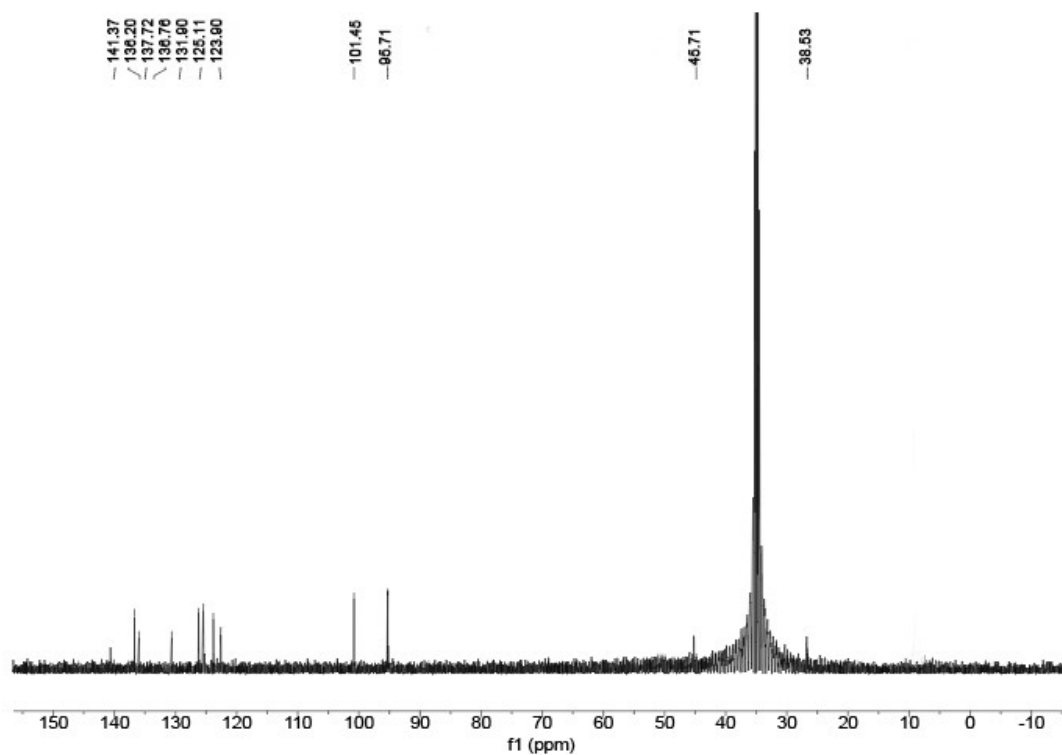

Figure S8.  $^{13}\text{C}$  NMR spectra of L4

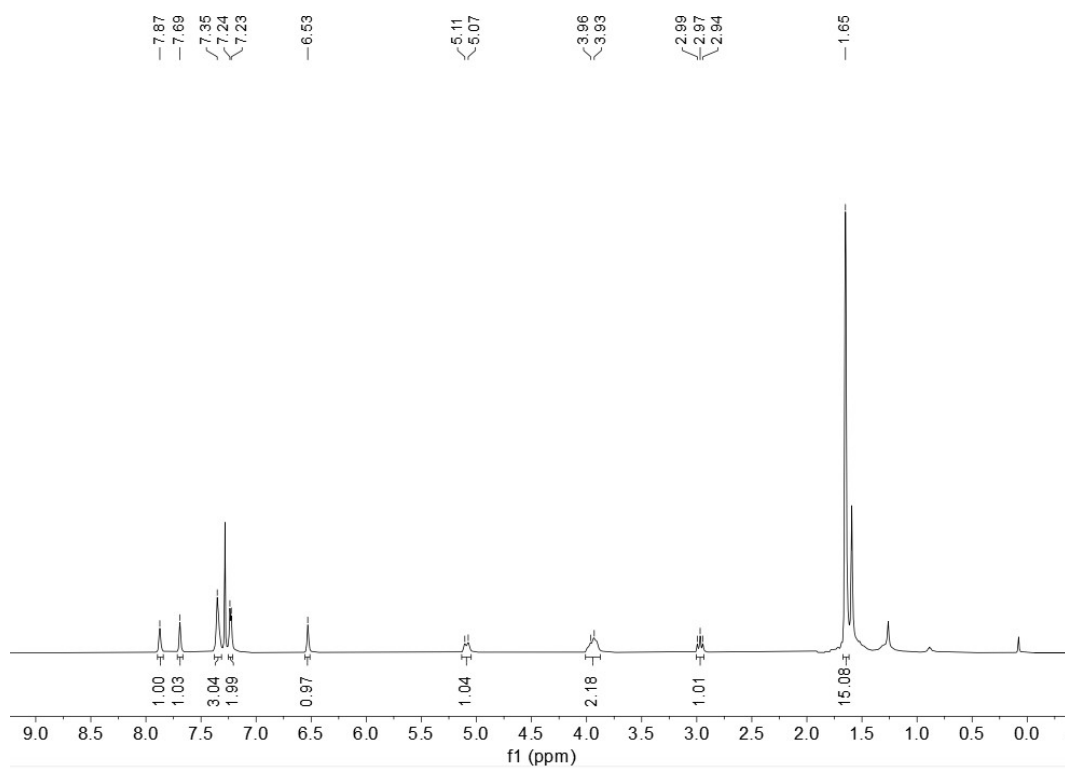

Figure S9.  $^1\text{H}$  NMR spectra of **1**

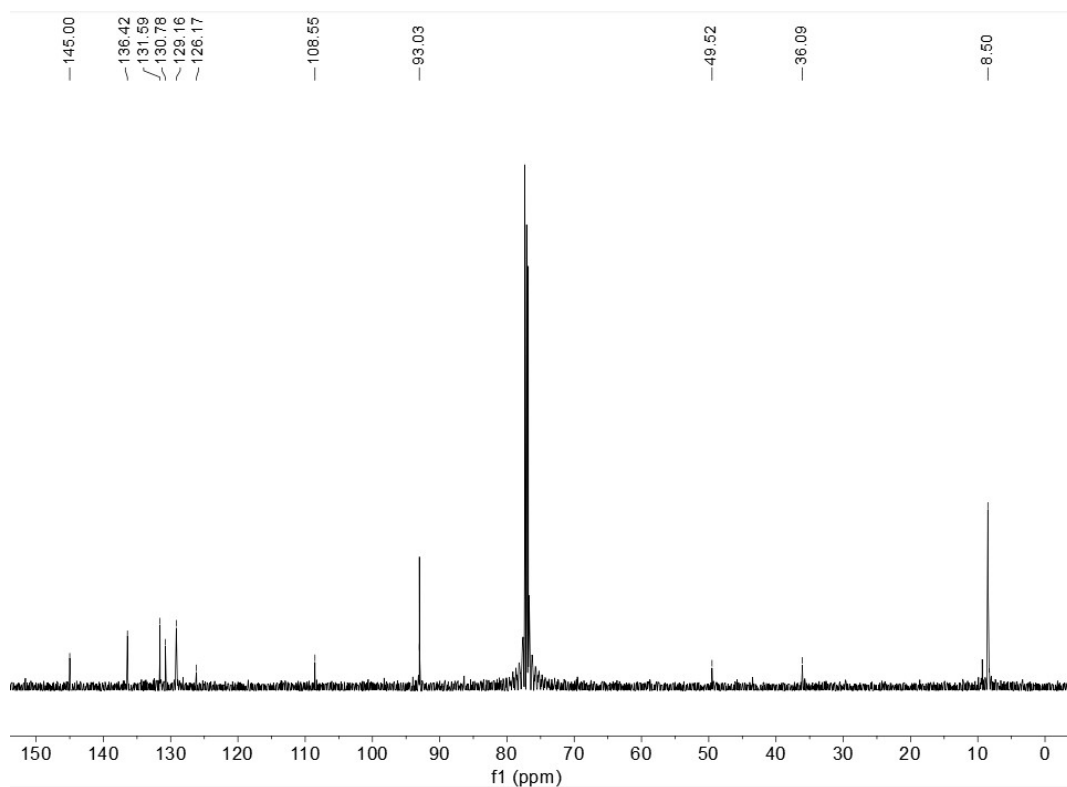

Figure S10.  $^{13}\text{C}$  NMR spectra of **1**



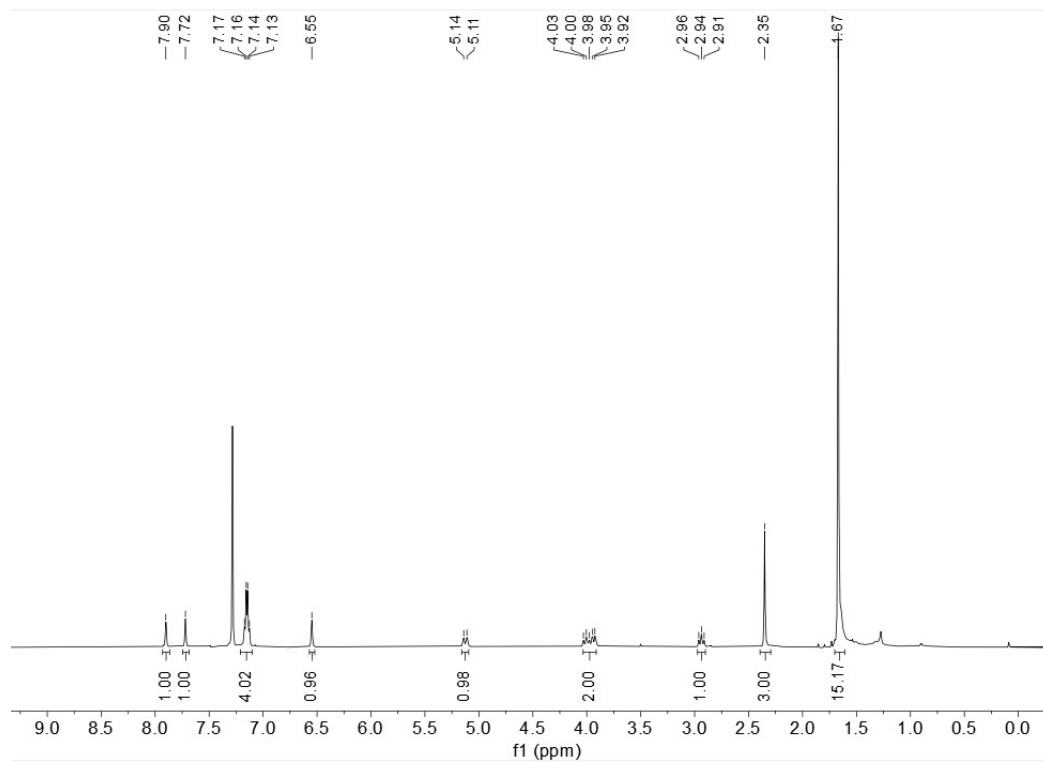

Figure S11.  $^1\text{H}$  NMR spectra of **2**

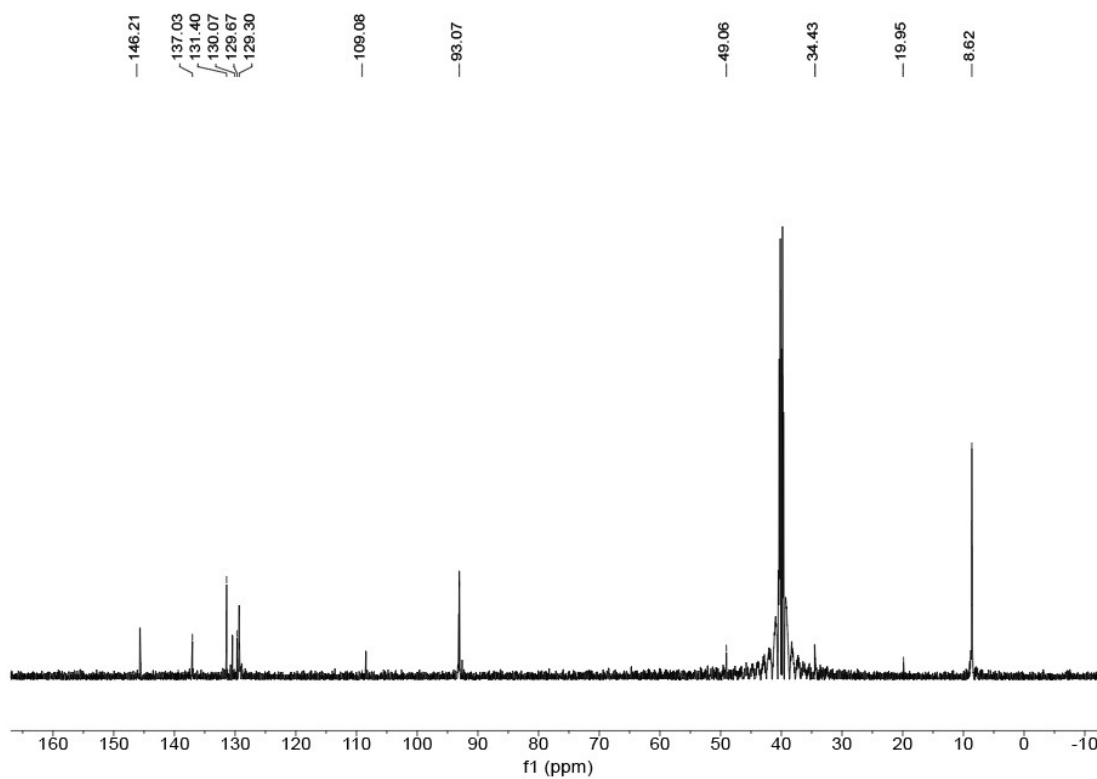

Figure S12.  $^{13}\text{C}$  NMR spectra of **2**

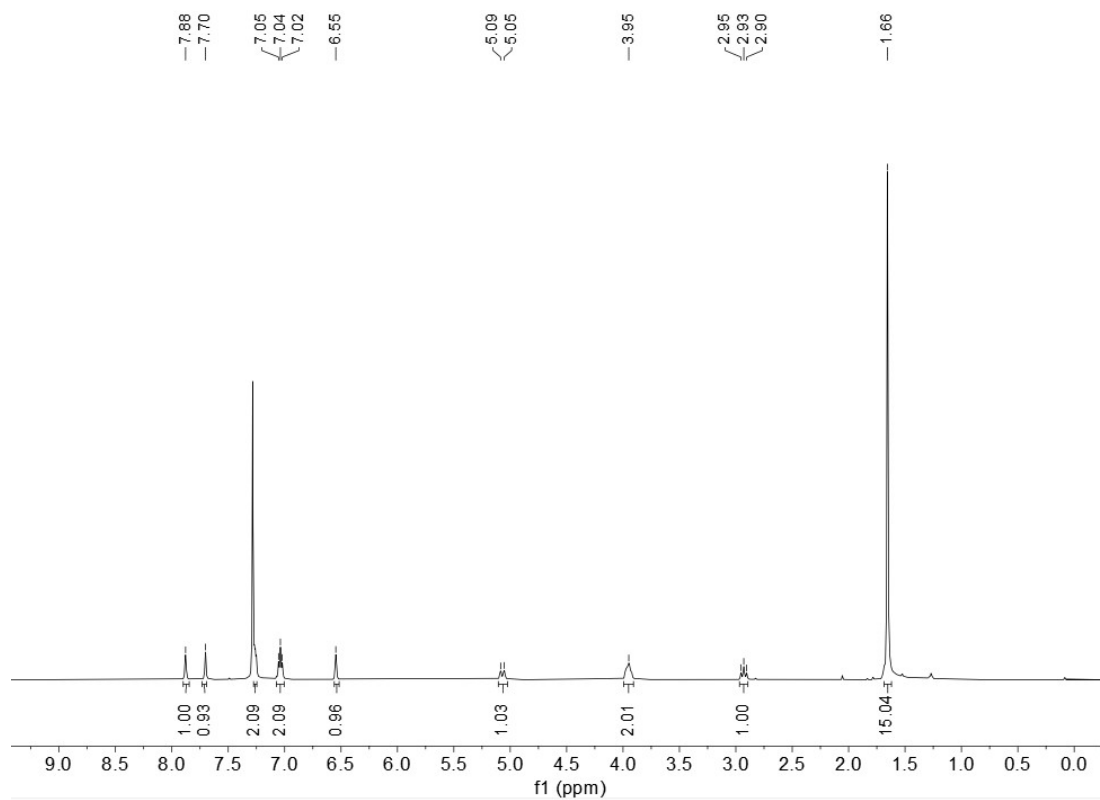

Figure S13. <sup>1</sup>H NMR spectra of **3**

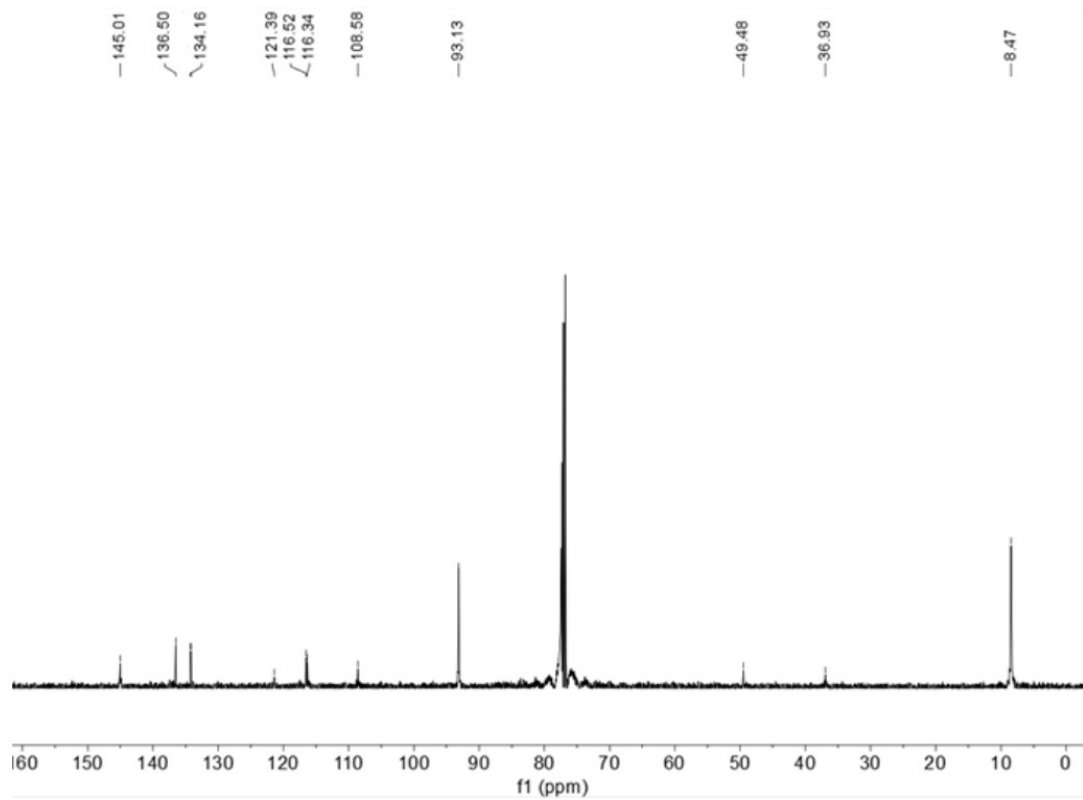

Figure S14. <sup>13</sup>C NMR spectra of **3**

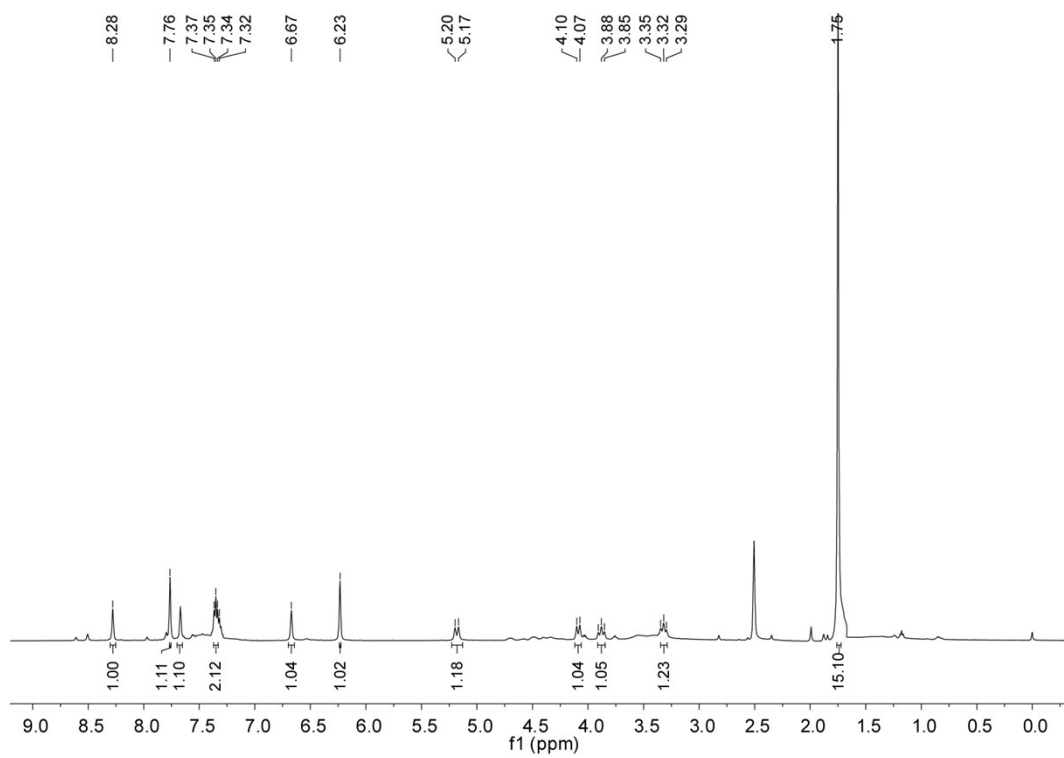

Figure S15.  $^1\text{H}$  NMR spectra of 4

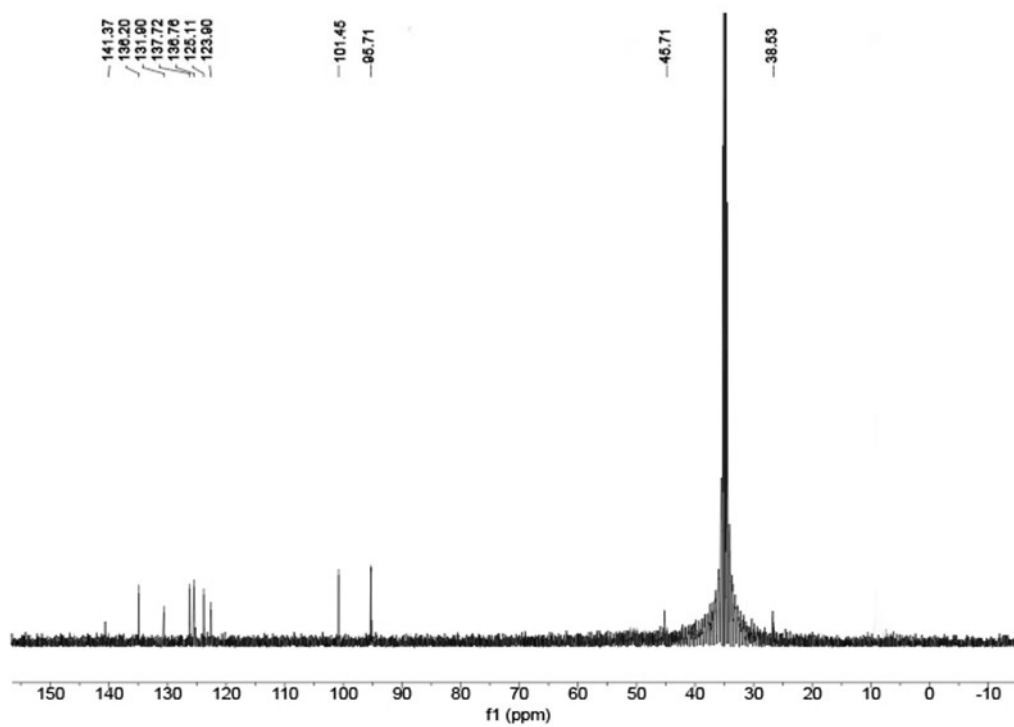

Figure S16.  $^{13}\text{C}$  NMR spectra of 4

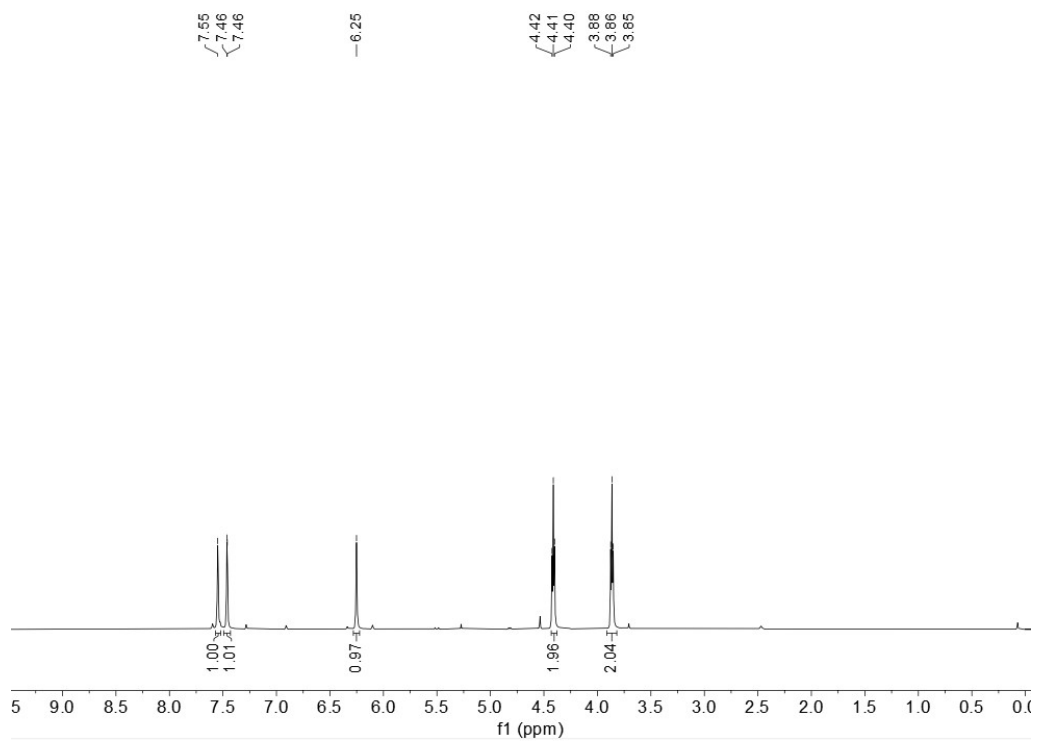

Figure S17. <sup>1</sup>H NMR spectra of 1-(2-chloroethyl)-1H-pyrazole
